# Supplementary material for: Nitrogen addition alters elemental stoichiometry within soil aggregates in a temperate steppe
Source: Copernicus journal article supplement (doi:10.5194/se-2016-129), 2016-09-12
Supplement: Supplementary file [file se-2016-129-AC1-supplement.pdf]

Dear Anonymous Reviewer #1:

Thanks so much for your valuable comments. Here, we have fixed these comments point by point. And reference to page and line numbers is for the revised manuscript with trace changes.

Comment: Soil Earth is a very broad scope journal and you need an introductory paragraph about the impact of fertilization and also the impact of nitrogen.

Response: Thanks for this nice comment. We have added this introductory paragraph as the 1<sup>st</sup> paragraph of our Introduction (Page 3, Line 1-10).

Comment: Useful citations were suggested.

Response: We have incorporated the related citation in our text as well as the reference list (Page 3, Line 1-10; references with marks in the reference list).

Comment: Use color in figures which is of important for the readability of your paper.

And move letters inside the figures.

Response: We have modified the figures accordingly.

Comment: Replace 'Treatment' by 'Treatments' in the figure.

Response: This has been corrected.
